# Supplementary material for: Preparation and crystalline transformation of functionalized poly(1-butene) containing PFPU and mPEG side chain
Source: Royal Society of Chemistry journal article supplement (doi:10.1039/d1ra07698a), 2021-01-01
Supplement: d1ra07698a1.pdf [file d1ra07698a1.pdf]

## Supporting Information for

### Preparation and Crystal Transition of Functionalized Poly (1-butene) Containing PFPU and mPEG Side Chain

*Chuang Li<sup>a</sup>, ZeFeng Cui<sup>a</sup>, Min Yang<sup>a</sup>, HaiFeng Shi<sup>b\*</sup>, BinYuan Liu<sup>a\*</sup>*

<sup>a</sup> Hebei Key Laboratory of Functional Polymer Materials, School of Chemical Engineering and Science, Hebei University of Technology, Tianjin 300130, China

<sup>b</sup> State Key Laboratory of Separation Membranes and Membrane Processes, School of Materials Science and Engineering, Tiangong University, Tianjin 30038, China

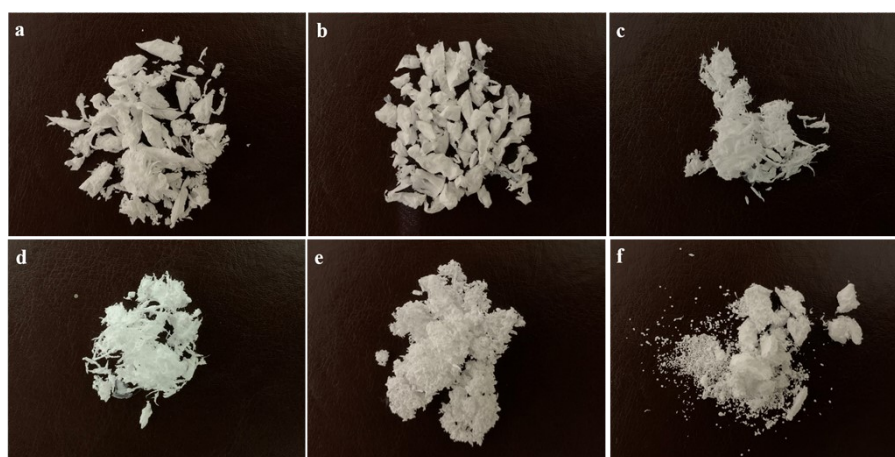

**Figure S1.** Photos of samples. (a) PB-0, (b) PB-0.03 mol %, (c) PB-0.16 mol %, (d) PB-0.26 mol %, (e) PB-0.36 mol %, (f) PB-0.59 mol %.

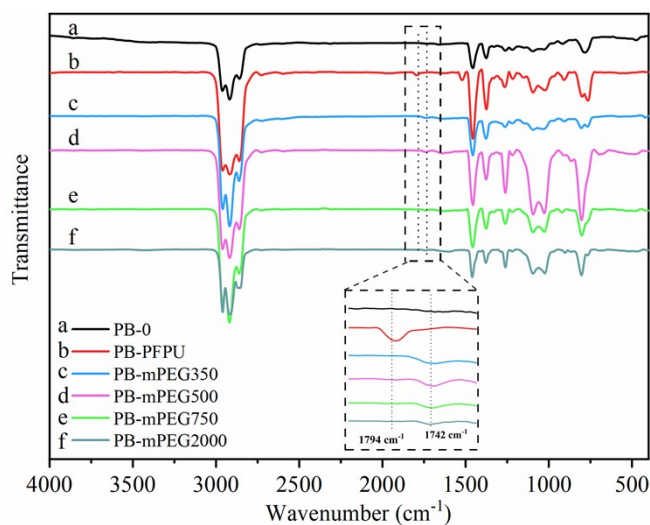

**Figure S2.** The IR spectra of PB-0, PB-PFP and PB-mPEG.

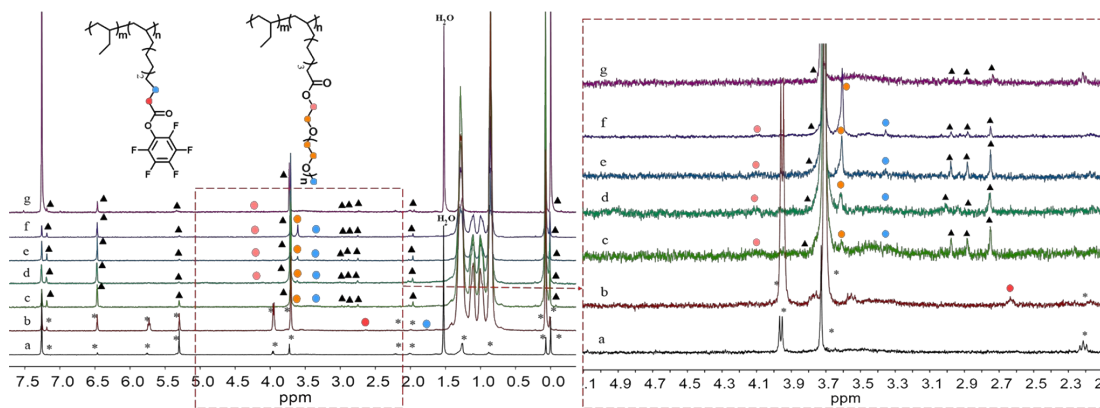

**Figure S3.**  $^1\text{H}$  NMR spectra of  $\text{CCl}_4$ , PB-PFP and PB-mPEG. (a)  $\text{CCl}_4$ , (b) PB-PFP, (c) PB-mPEG350, (d) PB-mPEG500, (e) PB-mPEG750, (f) PB-mPEG2000, (g) new- $\text{CCl}_4$ , the asterisk from  $\text{CCl}_4$ .

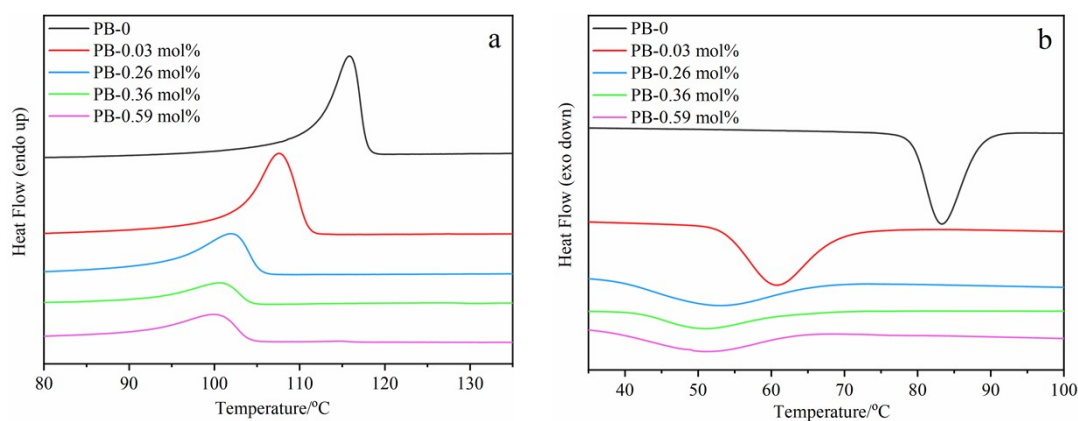

**Figure S4.** DSC results of PB with different PFP contents. (a) secondary heating curves, (b) cooling curves.

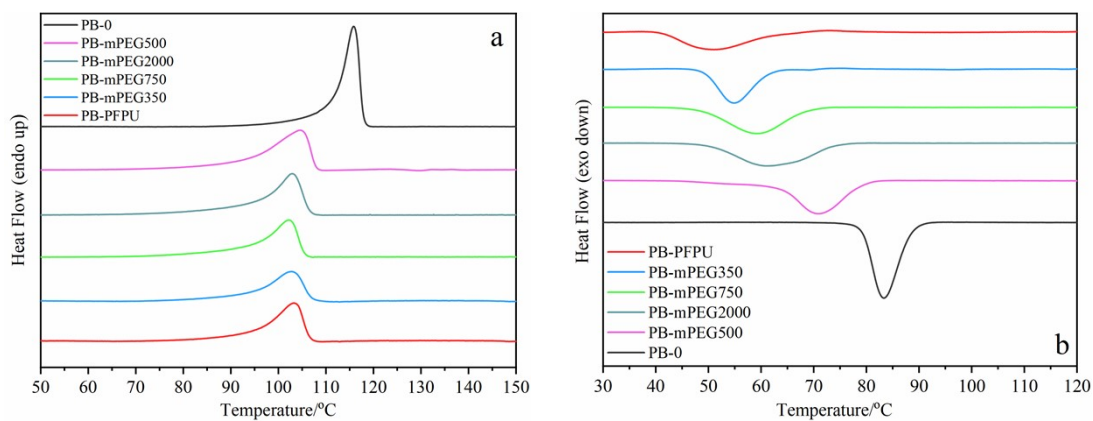

**Figure S5.** DSC results of PB with different molecular weight mPEGs. (a) secondary heating curves, (b) cooling curves.

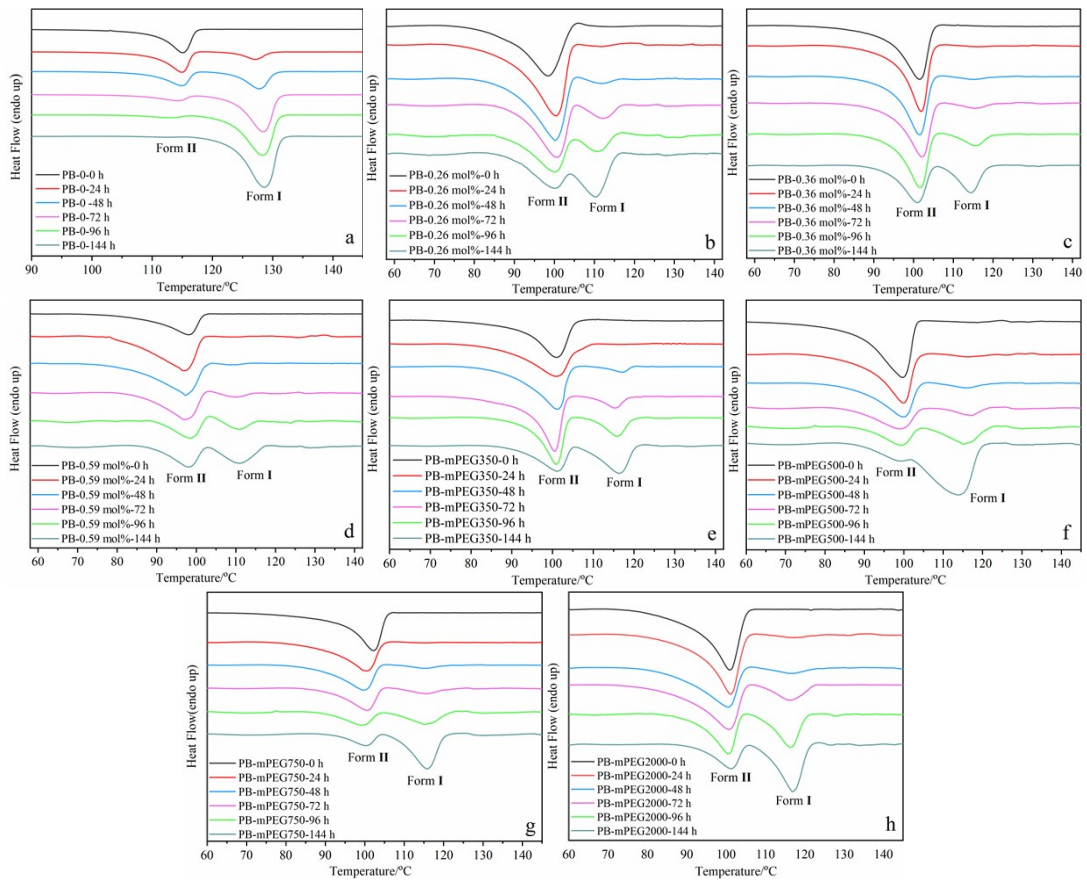

**Figure S6.** DSC results of phase transition of different samples. (a) PB-0, (b) PB-0.26 mol %, (c) PB-0.36 mol %, (d) PB-0.59 mol %, (e) PB-mPEG350, (f) PB-mPEG500, (g) PB-mPEG750, (h) PB-mPEG2000.

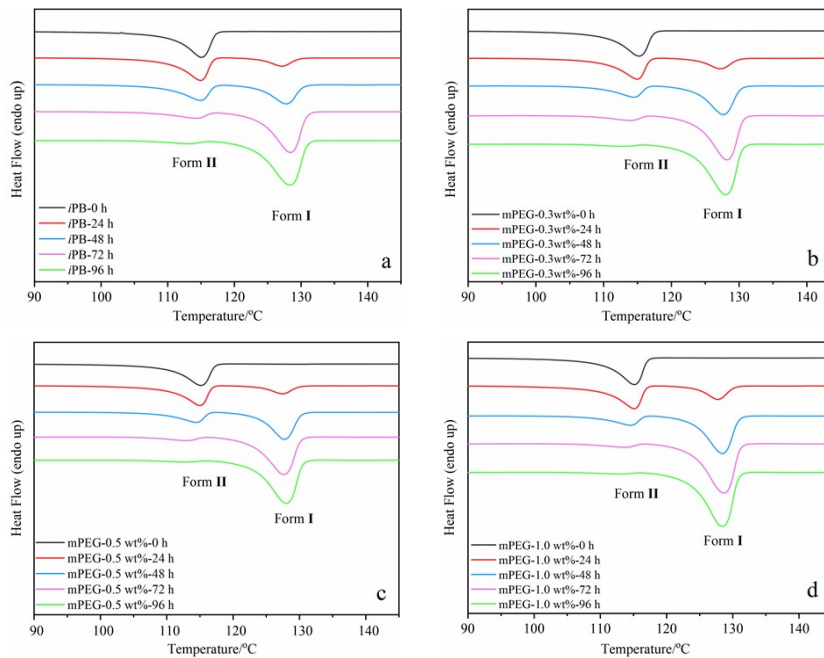

**Figure S7.** DSC curves of phase transition of PB with different mPEG addition amounts. (a) iPB; (b) mPEG-0.3 wt %; (c) mPEG-0.5 wt %; (d) mPEG-1.0 wt %.

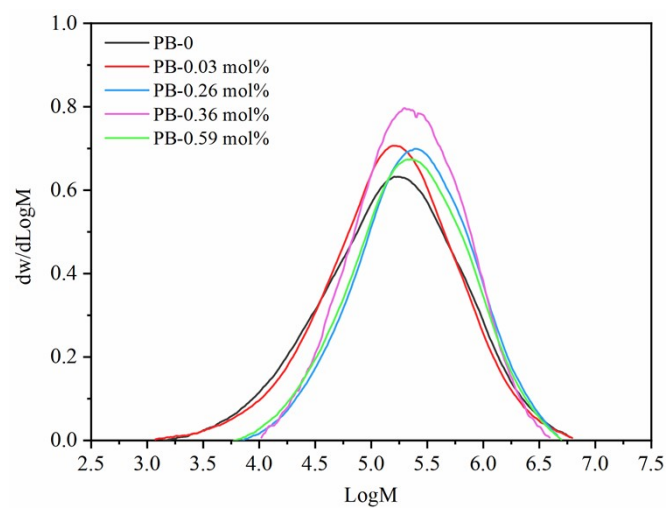

**Figure S8.** GPC curves of PB with different PFP contents.
